# Supplementary material for: A Mixture of Formic Acid, Benzoic Acid, and Essential Oils Enhanced Growth Performance via Modulating Nutrient Uptake, Mitochondrion Metabolism, and Immunomodulation in Weaned Piglets
Source: MDPI journal article supplement (doi:10.3390/antiox13020246), 2024-02-19
Supplement: s1 [file s1]

Table S1 Primer sequences used in real-time PCR

| Gene Name                      | Primer Sequence(5'-3') |                          |
|--------------------------------|------------------------|--------------------------|
| <i>GLUT1</i>                   | GATGAAGGAGGAGTGCCG     | CAGCACCACGGCGATGAGGAT    |
| <i>GLUT8</i>                   | TATGTTGCGGATGCTATGGG   | ATGAGATGGTCCCAATTTCG     |
| <i>SGLT1</i>                   | ATTCTTTGGTGGGATGCTTG   | CATCATCGTCCTGGTCGTC      |
| <i>SGLT3</i>                   | CCTTGGGATTGGACCTTTATC  | CGTTTGCGGAGGGTGTCTGTGT   |
| <i>SGLT5</i>                   | GCGTCCAGATCGGCAGAACC   | GCGTCCAGATCGAGAACCT      |
| <i>LAT1</i>                    | GCCCATTTGTCACCATCATC   | GAGCCCACAAAGAAAAGC       |
| <i>SLC1A4</i>                  | AGACCTCTCTTTGATCCTGC   | TGTTTCCTCCTCTGATTTGCA    |
| <i>SLC7A1</i>                  | GCCTGAGAGCAAGACCAAA    | GCCGTAGCCGAAGTAGATGA     |
| <i>SLC7A2</i>                  | GCCCCAGAATCAGCAAAAA    | GATGCTGAAGGCTGGCAAAA     |
| <i>SLC7A5</i>                  | CTCTTCCTGATCGCCGTCTC   | CTTCTGACACAGGACGGTCGT    |
| <i>SLC15A1</i>                 | TTCGGTTATCCCTTGAGCAT   | GTGGTAGATGGCAGTGGACAGG   |
| <i>SNAT1</i>                   | AAGAACCTGGGCTATCTCG    | TGTTGCGTTAGGACTCGTTG     |
| <i>SNAT2</i>                   | GTTACCTTTGGTGATCCAGG   | ACCAATGACACCAGCAGAACC    |
| <i>rBAT</i>                    | TTTCCGCAATCCTGATGTTC   | GGGTCTTATTCACTTGGGTC     |
| <i>CD36</i>                    | GGACTCATTGCTGGTGCTGT   | GTCTGTAAACTTCCGTGCCTGT   |
| <i>FABP1</i>                   | CAGAAGGGGAAGGATGTCA    | CTCCCCAGTCATGAACTCCA     |
| <i>FABP2</i>                   | ACATCACTTGTGCGGGGAAA   | CCAGTGTCACGATGGACTTG     |
| <i>FABP3</i>                   | CTGGGAGTGGAGTTTGATG    | CCATGGGTGAGTGTCAAGAT     |
| <i>FABP4</i>                   | TGAAAGGTGTCACGGCTAC    | TCGGGACAATACATCCAACAGG   |
| <i>FABP5</i>                   | CTGGGACAGAAGTTTGAAG    | GACCCGAGTGCAGGTGACATT    |
| <i>FATP1</i>                   | GGCAACAGACGTGATCTATG   | AGCGGCTGGCTGAAAACCT      |
| <i>FATP4</i>                   | AGCCGCATCCTGTCCTTT     | GACATCCTTGGCGATCTTTT     |
| <i>TNF-<math>\alpha</math></i> | GCCCTTCCACCAACGTTTTTC  | CAAGGGCTCTTGATGGCAGA     |
| <i>TGF-<math>\beta</math></i>  | GGCACTGCTTCCCGAATGTC   | ACCGCAACAACGCCATCTATGAG  |
| <i>IL-1<math>\beta</math></i>  | ATTCAGGGACCCTACCCTCT   | ATCACTTCCTTGGCGGGTTC     |
| <i>IL-6</i>                    | ACAAAGCCACCACCCCTAA    | CGTGGACGGCATCAATCTCA     |
| <i>IL-12</i>                   | CAACCCTGTGCCTTAGCAGT   | AGAGCCTGCATCAGCTCAGT     |
| <i>TLR4</i>                    | GAGCCGGAAGGTTATTGTGG   | GAGCCGGAAGGTTATTGTGGTATG |
| <i>My-D88</i>                  | AGCAGAACCAGGAGTCCGA    | GGGCAGTAGCAGATAAAGGCATC  |

---

|                |                       |                         |
|----------------|-----------------------|-------------------------|
| <i>IκB</i>     | AGACCCAGGAGTG TTCACA  | GTCACCAGGCGAGTTATAGCT   |
| <i>IKKα</i>    | GGATATGAGGAAGCGGCATG  | CCTGATACTGGCACTTCGGACAA |
| <i>IKKβ</i>    | GTCACCAGGCGAGTTATAGC  | CTTCACCTGTCAAACCTGGCT   |
| <i>PGC-1α</i>  | GCTTGACGAGCGTCATTCAG  | GGTCTTCACCAACCAGAGCA    |
| <i>NRF1</i>    | GAAGCTGTCCAGGGGCTTTA  | ATCCATGCTCTGCTACTGGG    |
| <i>TFAM</i>    | AGCGAGGTCTGAAGAGTTGC  | TTGCACCCGTAGACAAAGCA    |
| <i>POLG</i>    | CTGTCAGATGAGGGCGAGTG  | ACTTCTTCCGTCGTGACTTTCT  |
| <i>NDUFA1</i>  | GCTTCCGGGGAAGGAATCAA  | CCGGGGAGAATTTCTGAACCA   |
| <i>NDUFA6</i>  | TCTCAGAGCCTTG CATGTCG | AAGCCATCCAGCATCGTACC    |
| <i>NDUFA13</i> | ATGAAGGATGTGCCG GACTG | CCATAGGTGGCGCTGAGAAT    |
| <i>NDUFB1</i>  | TGCCTTCCGGAACAAGAGT   | GCAATTCAGCCACAGCCTTT    |
| <i>SDHA</i>    | CAATAAGAGGTCGTCGGCC   | AGAGAGACCAAACGCAGCTC    |
| <i>SDHB</i>    | TCCTATGGTGTTGGATGCGT  | AGTGTTGCCTCCGTTGATGT    |
| <i>UQCRB</i>   | CATCAGGCAACGCTTCTGTC  | TATACCCTCCAGCCACTTGC    |
| <i>Cyt c</i>   | CTGGGGAGAGGAGACACTG   | AGGCGGTGGCCAACTTTTAC    |
| <i>COX4</i>    | CCAAGTGGGACTACGACAA   | CCTGCTCGTTTATTAGCACTGG  |
| <i>COX5</i>    | ATCTGGAGGTGGTGTTTCCTA | GTTGGTGATGGAGGGGACTAAA  |
| <i>ATP5A</i>   | ACGCCATTGATGGAAAGGG   | TGGTTCCCGCACAGAGATTC    |
| <i>ATP5B</i>   | CATGTTGGGCTTTGTGGGTC  | ATAGTCTCTGGCAGGCTGGA    |
| <i>β-Actin</i> | TGCGGGACATCAAGGAGAA   | AGTTGAAGGTGGTCTCGTG     |

---
